# Supplementary material
Source: PubMed Central journal article supplement (PMC8641323)
Supplement: tpmd201513.SD1.pdf [file tpmd201513.SD1.pdf]

## **Supplementary Materials**

**Overview:** The parent cohort (PREVAIL III: Ebola Natural History Study) collected a large amount of data with the potential to analyze. Supplemental Tables 1 and 2 demonstrate how our use of hypotheses restricted our analyses of clinical finding to a select few. Even after restricting our analyses, we acknowledge the potential to organize clinical findings at the organ system level and individual symptom level. The baseline clinical findings found in Supplemental Table 3 are organized as organ systems, which grouped some symptoms, and offers another way to interpret the findings, which may be particularly attractive for clinicians. Subsequent to baseline, measurements of stigma did not occur at every study visit, and while established in the literature, stigma and clinical findings declined over time. We provide these additional but important details in Supplemental Tables 4, 5, and 6.

| Body System          | Clinical Finding             | Findings associated with EVD survivors | Additional findings associated with psychosomatic illness |
|----------------------|------------------------------|----------------------------------------|-----------------------------------------------------------|
| Constitutional       | Fever                        |                                        |                                                           |
|                      | Chills                       |                                        |                                                           |
|                      | Night sweats                 |                                        |                                                           |
|                      | Weight loss                  |                                        |                                                           |
|                      | Weight gain                  |                                        |                                                           |
|                      | Fatigue                      |                                        |                                                           |
| Ear, nose and throat | Decreased hearing            |                                        |                                                           |
|                      | Tinnitus                     |                                        |                                                           |
|                      | Pain                         |                                        |                                                           |
|                      | Discharge from ear           |                                        |                                                           |
|                      | Discharge from nose          |                                        |                                                           |
|                      | Hoarseness                   |                                        |                                                           |
|                      | Nose bleeds                  |                                        |                                                           |
| Breast               | Lumps                        |                                        |                                                           |
|                      | Nipple Discharge             |                                        |                                                           |
|                      | Pain                         |                                        |                                                           |
| Cardiovascular       | Palpitations                 |                                        |                                                           |
|                      | Chest pain                   |                                        |                                                           |
|                      | Shortness of breath          |                                        |                                                           |
|                      | Paroxysmal nocturnal dyspnea |                                        |                                                           |
|                      | Orthopnea                    |                                        |                                                           |
|                      | Claudication                 |                                        |                                                           |
|                      | Edema                        |                                        |                                                           |
| Respiratory          | Wheezing                     |                                        |                                                           |
|                      | Dyspnea                      |                                        |                                                           |
|                      | Cough/sputum                 |                                        |                                                           |
|                      | Hemoptysis                   |                                        |                                                           |
|                      | Positive TB skins test       |                                        |                                                           |
|                      | Congestion                   |                                        |                                                           |
| Gastrointestinal     | Dysphagia                    |                                        |                                                           |
|                      | Anorexia                     |                                        |                                                           |
|                      | Nausea                       |                                        | Nausea                                                    |
|                      | Vomiting                     |                                        | Vomiting                                                  |
|                      | Hematemesis                  |                                        |                                                           |
|                      | Diarrhea                     |                                        | Diarrhea                                                  |
|                      | Melena                       |                                        |                                                           |
|                      | Rectal bleeding              |                                        |                                                           |
|                      | Change in bowel habits       |                                        |                                                           |
| Jaundice             |                              |                                        |                                                           |
|                      | Abdominal pain               |                                        | Abdominal pain                                            |
| Genitourinary        | Dysuria                      |                                        |                                                           |
|                      | Hematuria                    |                                        |                                                           |
|                      | Frequency                    | Frequency                              |                                                           |
|                      | Polyuria                     |                                        |                                                           |
|                      | Urgency                      |                                        |                                                           |
|                      | Hesitancy                    |                                        |                                                           |
|                      | Incontinence                 |                                        |                                                           |
|                      | Nocturia                     |                                        |                                                           |

|                     |                                                                                                                                                                               |                                         |
|---------------------|-------------------------------------------------------------------------------------------------------------------------------------------------------------------------------|-----------------------------------------|
| Male reproductive   | Penile discharge<br>Testicular pain or mass<br>Infertility<br>Impotence/deceased libido<br>Orchitis                                                                           | Impotence/deceased libido               |
| Female reproductive | Menarche<br>Menopause<br>Postmenopausal symptoms<br>Painful periods<br>Odor<br>Decreased libido<br>Amenorrhea<br>Abnormal vaginal bleeding                                    |                                         |
| Musculoskeletal     | Joint pain<br>Edema<br>Heat<br>Redness<br>Stiffness<br>Deformity<br>Muscle pain or tenderness                                                                                 | Joint pain<br>Muscle pain or tenderness |
| Neurological        | Headache<br>Syncope<br>Dizziness<br>Vertigo<br>Seizures<br>Loss of vision<br>Diplopia<br>Paresthesia<br>Paralysis<br>Weakness in any limbs<br>Tremor<br>Ataxia<br>Memory loss | Headache<br>Memory loss                 |
| Lymphatic Eye       | Enlargement of lymph nodes<br>Blurry vision<br>Pain in eye<br>Sensitivity to light<br>Eye redness<br>Discharge from eye<br>Itchy eyes                                         |                                         |

Supplemental Table 1: Self-reported symptoms collected by PREVAIL III and its use in study hypotheses.

| Body System           | Clinical Finding                                                                                                                                                                                                                                        | Findings associated with EVD survivors |
|-----------------------|---------------------------------------------------------------------------------------------------------------------------------------------------------------------------------------------------------------------------------------------------------|----------------------------------------|
| Head and face         | Deformity<br>Swelling<br>Asymmetry                                                                                                                                                                                                                      |                                        |
| Ears, nose and throat | Nose: Deformity/mass<br>Nose: Mucosa<br>Nose: Ulcer<br>Ear: Tympanic membrane<br>Ear: External canal<br>Ear: Hearing<br>Mouth/throat: Mucosa<br>Mouth/throat: Mass<br>Mouth/throat: Ulcer<br>Mouth/throat: Missing teeth<br>Mouth/throat: Dental caries |                                        |
| Chest                 | Wheezes<br>Decreased breath sounds<br>Heart murmur<br>Pericardial rub<br>Rales/crackles                                                                                                                                                                 | } Chest                                |
| Abdomen               | Splenomegaly<br>Hepatomegaly<br>Mass<br>Tenderness<br>Distension                                                                                                                                                                                        | } Abdomen                              |
| Extremities           | Deformity<br>Edema<br>Cyanosis<br>Decreased pulse<br>Bruit                                                                                                                                                                                              |                                        |
| Musculoskeletal       | Atrophy<br>Weakness<br>Tenderness<br>Swelling/effusion<br>Synovial tenderness<br>Deformity<br>Decreased range of motion                                                                                                                                 | } Musculoskeletal                      |
| Neurologic            | Cognition<br>Speech<br>Tremor<br>Reflexes<br>Cranial nerve(s)<br>Focal weakness<br>Gait/balance<br>Sensory                                                                                                                                              | } Neurologic                           |
| Skin                  | Rash<br>Mass<br>Lesion<br>Jaundice<br>Pigmentation                                                                                                                                                                                                      |                                        |
| Breast                | Mass<br>Skin retraction<br>Nipple discharge                                                                                                                                                                                                             |                                        |

|            |                    |         |
|------------|--------------------|---------|
| Ophthalmic | Uveitis            | Uveitis |
|            | Cataract           |         |
|            | Pseudophakia       |         |
|            | Macular edema      |         |
|            | Retinal detachment |         |
|            | Dry eye            |         |
|            | Presbyopia         |         |
|            | Ocular allergy     |         |

Supplemental Table 2: Physical examination findings collected by PREVAIL III and its use in study hypotheses

| Clinical Symptom Group        | Odds ratio (95% CI) | p-value |
|-------------------------------|---------------------|---------|
| Constitutional symptoms       | 1.15 (1.03, 1.28)   | 0.015   |
| Musculoskeletal symptoms      | 1.19 (1.08, 1.32)   | 0.001   |
| Genitourinary symptoms        | 1.2 (1.08, 1.32)    | 0.001   |
| Neurological symptoms         | 1.07 (0.97, 1.18)   | 0.171   |
| Gastrointestinal symptoms     | 1.17 (1.06, 1.3)    | 0.002   |
| Eye symptoms                  | 0.9 (0.81, 1)       | 0.061   |
| Chest exam findings           | 1.06 (0.86, 1.31)   | 0.574   |
| Neurologic exam findings      | 1.01 (0.83, 1.24)   | 0.902   |
| Abdominal exam findings       | 1.2 (1.07, 1.35)    | 0.003   |
| Musculoskeletal exam findings | 1.00 (0.84, 1.19)   | 0.997   |

Supplemental Table 3: Associations between EVD-related stigma and groups of clinical findings at baseline adjusting for age, sex, education, referral to medical care and HIV status

|                               | Baseline | Visit 2 (6 months) | Visit 3 (12 months) | Visit 4 (18 months) |
|-------------------------------|----------|--------------------|---------------------|---------------------|
|                               | N=859    | N=755              | N=759               | N=740               |
| Fatigue                       | 19.9%    | 9.5%               | 5.7%                | 1.2%                |
| Nausea                        | 7.7%     | 2.4%               | 2.1%                | 0.3%                |
| Abdominal pain                | 24%      | 11.9%              | 12.6%               | 9.2%                |
| Decreased libido              | 18.5%    | 10.9%              | 6.5%                | 2.7%                |
| Muscle pain                   | 24.7%    | 15.5%              | 14.2%               | 8.4%                |
| Joint pain                    | 51.1%    | 38.1%              | 30.7%               | 21.5%               |
| Headache                      | 48.9%    | 39.1%              | 34.5%               | 19.1%               |
| Urinary frequency             | 15.9%    | 2.8%               | 2.4%                | 1.1%                |
| Memory loss                   | 31.2%    | 11.8%              | 5.3%                | 0.9%                |
| Eye redness                   | 30.2%    | 22.5%              | 15.5%               | 7.7%                |
| Uveitis <sup>1</sup>          | 28.4%    | -                  | 21.1%               | -                   |
| Chest exam findings           | 5.1%     | 2.6%               | 1.6%                | 0.9%                |
| Neurologic exam findings      | 5.6%     | 3.6%               | 1.6%                | 0.9%                |
| Abdominal exam findings       | 19.1%    | 13%                | 13.3%               | 12.8%               |
| Musculoskeletal exam findings | 8.3%     | 4.4%               | 3.3%                | 1.8%                |

1. The percentages of uveitis cases at visit 1 and visit 3 are measured out of 793 and 475 participants respectively.

Supplemental Table 4: Clinical findings at each visit

|                                                                      | Baseline<br>N=859 | Visit 4 (18 months)<br>N=740 |
|----------------------------------------------------------------------|-------------------|------------------------------|
| Forced to change residence because of social alienation from family? | 213 (24.8%)       | 26 (3.5%)                    |
| Lost a job or another source of income because of being infected?    | 302 (35.2%)       | 10 (1.4%)                    |
| Lost a spouse because of fear of being infected?                     | 72 (8.4%)         | 5 (0.7%)                     |
| Deprived from attending gathering (e.g., school, church, social)?    | 97 (11.3%)        | 3 (0.4%)                     |
| Isolated yourself from family and/or friends?                        | 174 (20.3%)       | 15 (2%)                      |
| Withdrew from education/training or did not take up an opportunity?  | 104 (12.1%)       | 0 (0%)                       |
| Afraid that someone would not want to be sexually intimate?          | 188 (21.9%)       | 3 (0.4%)                     |

Supplemental Table 5: EVD-related stigma at study baseline and follow-up

|                                                       | Visit 1 (Baseline) | Visit 2 (Month 6) | Visit 3 (Month 12) | Visit 4 (Month 18) |
|-------------------------------------------------------|--------------------|-------------------|--------------------|--------------------|
| <b>Data collection</b>                                |                    |                   |                    |                    |
| Clinical findings                                     | X                  | X                 | X                  | X                  |
| Stigma index                                          | X                  |                   |                    | X                  |
| <b>Available data for analyses</b>                    |                    |                   |                    |                    |
| Concurrent associations: Clinical findings and stigma | X                  |                   |                    | X                  |
| Lagged associations: Clinical findings cause stigma   |                    |                   | X                  | X                  |
| Lagged associations: Stigma causes clinical findings  | X                  | X                 |                    |                    |

Supplemental Table 6: PREVAIL III Measurement Timeline and Available Data for Analyses
